# Supplementary material
Source: PubMed Central journal article supplement (PMC9556978)
Supplement: NIHMS1837221-supplement-1.pdf [file NIHMS1837221-supplement-1.pdf]

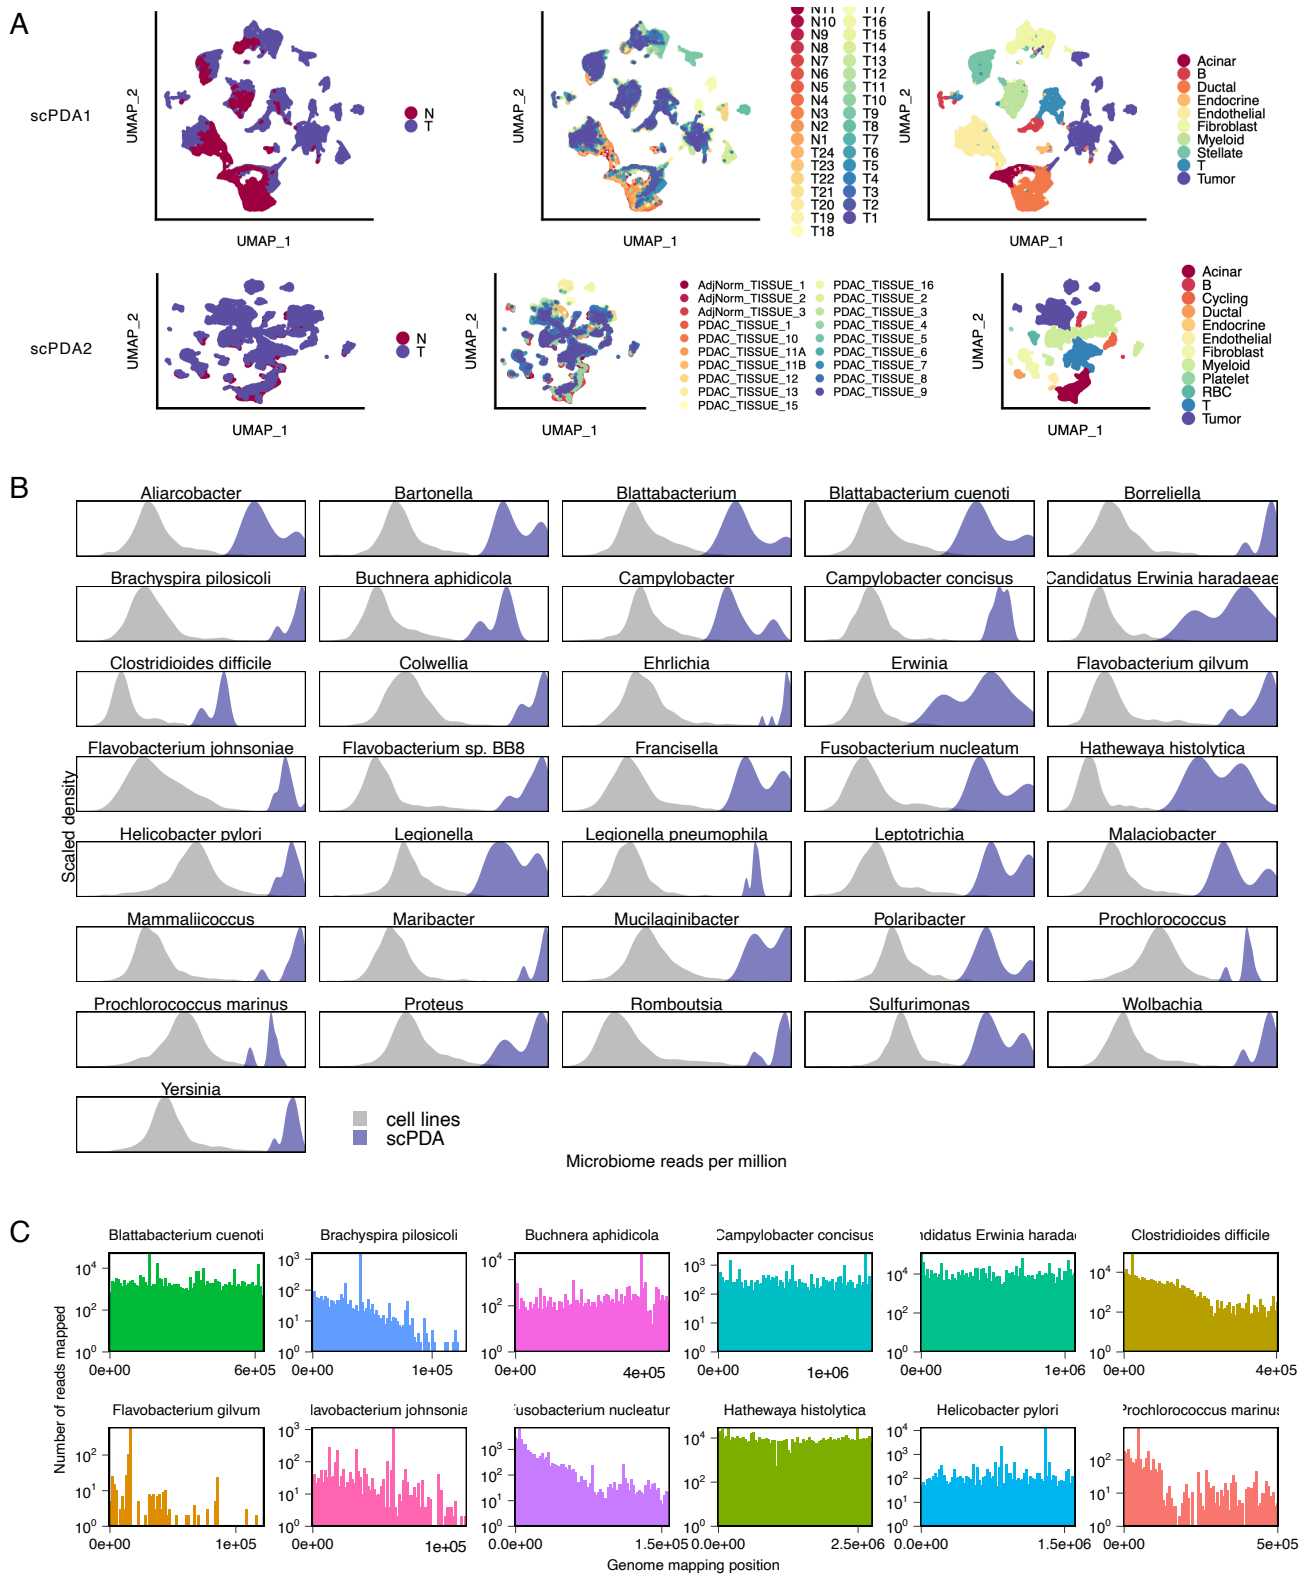

**Figure S1. Cell-type clustering and bacterial detection, Related to Figure 1** (A) Uniform manifold projection and approximation (UMAP) plots for somatic cell data from scPDA1 (top,  $n=57,530$  cells) and scPDA2 (bottom,  $n=59,473$  cells). Cells are colored by: left: tumor or normal sample; middle: sample ID; right: cell type. (B) Density plots comparing bacterial reads per million in scPDA1-2 and the cell-line negative control reference. (C) Histograms of the genome mapping positions for the taxa resolved to the species level in scPDA1-2.

A

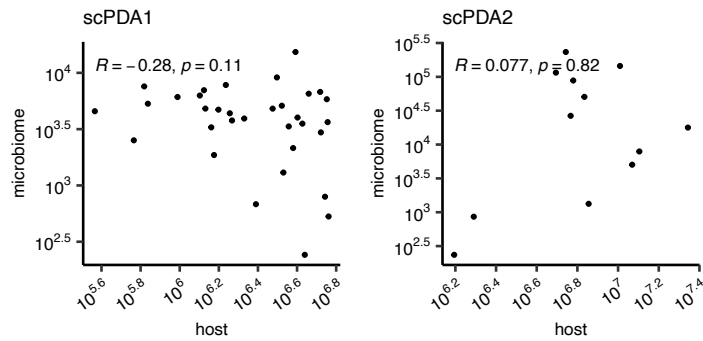

B

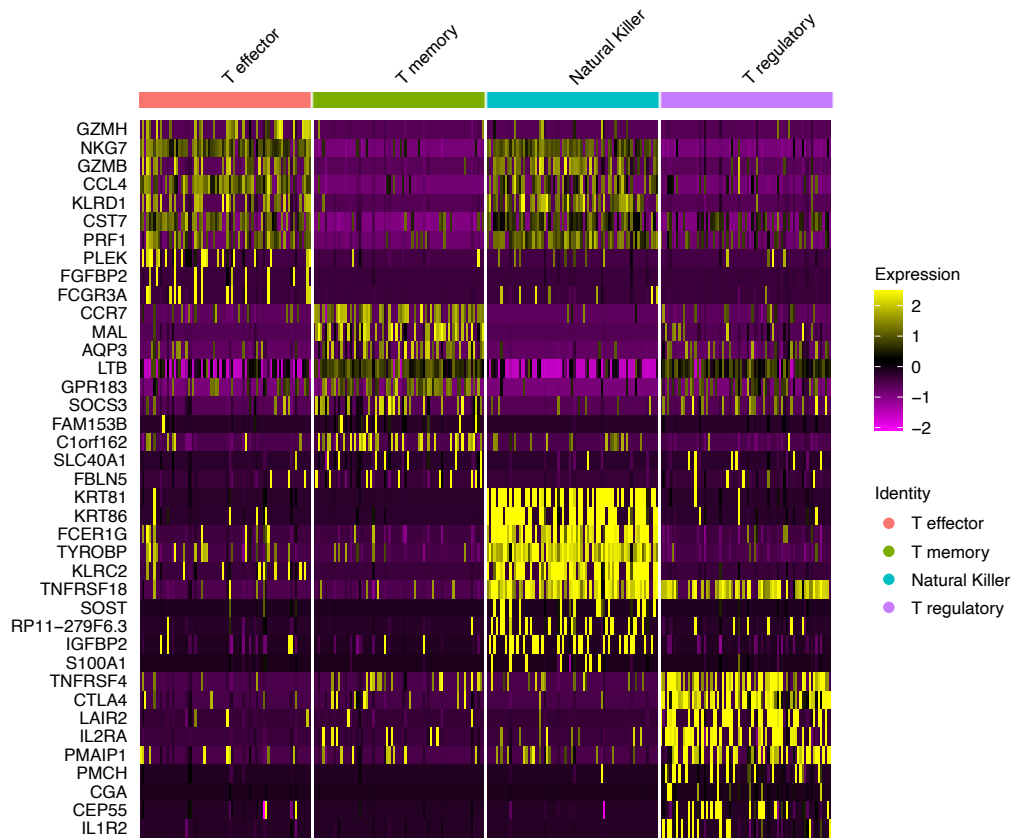

**Figure S2. Microbiome and somatic counts and T-cell subtype markers, Related to Figure 2 and Figure 4 (A)** Scatter plot showing the number of somatic vs. microbial gene counts per sample in scPDA1 (left, n=35 samples) and scPDA2 (right, n=20 samples). Spearman correlation tests. **(B)** Heatmap of scaled normalized expression highlighting differentially expressed genes as defined by two-sided Wilcoxon rank-sum test with Bonferroni FDR correction in scPDA1-2 T-cell subtypes.
